# Supplementary material
Source: PubMed Central journal article supplement (PMC2818911)
Supplement: 0908082106_pnas.0908082106_SI.pdf [file 0908082106_pnas.0908082106_SI.pdf]

# Supporting Information

Turano et al. 10.1073/pnas.0908082106

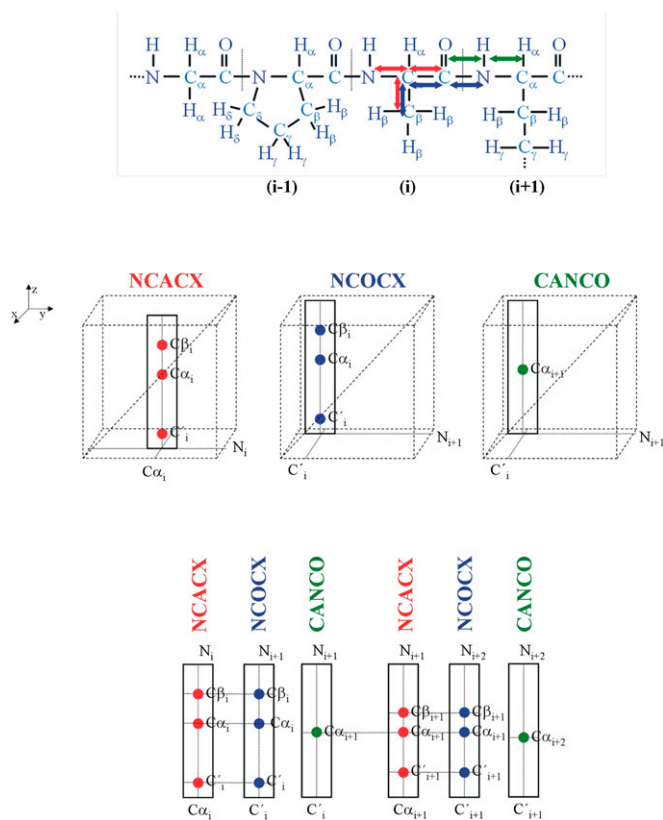

**Fig. S1.** Schematic representation of the possible connectivities detected in the 3D experiments NCACX (red), NCOCX (blue), and CANCO (green) used for the sequential assignment at the solid state. A peak in the NCACX resonates at the frequencies of  $N_i$ - $C\alpha_i$ - $CX_i$ , where  $CX_i$  can be one of the  $^{13}\text{C}$  nuclear spins of residue  $i$  ( $C'_i$ ,  $C\alpha_i$ ,  $C\beta_i$ , etc.). A peak in the NCOCX resonates at the frequencies of  $N_{i+1}$ - $C'_i$ - $CX_i$ . A peak in the CANCO resonates at the frequencies of  $C\alpha_{i+1}$ - $N_{i+1}$ - $C'_i$ . Independently of the acquisition dimension, the 3D spectra are oriented with the  $^{15}\text{N}$  dimension along the x axis. Each strip is therefore a portion of a  $^{13}\text{C}$ - $^{13}\text{C}$  plane ( $y, z$ ), centered at the  $^{13}\text{C}$  frequency reported in the bottom of each spectrum and extracted from a plane at the indicated  $^{15}\text{N}$  frequency. The vertical strips are then visualized next to one another (as in Figs. S2 and S3) and used to build up sequential patterns. A strip at a given  $^{15}\text{N}$  frequency in the NCACX permits the identification of intraresidue (residue  $i$ )  $C\alpha$ ,  $C\beta$ , and  $C'$ . Comparison with the following NCOCX strip allows the identification of the backbone  $^{15}\text{N}$  frequency for the following amino acid ( $i + 1$ ). With this  $^{15}\text{N}$  frequency, in the CANCO we can identify the  $C\alpha$  of the ( $i + 1$ ) residue.





**Table S1. Magnetic properties (per subunit) of iron-loaded ferritin at different degrees of metallation, as deduced from Evans measurements at 298 K**

| Number of iron atoms per ferritin subunit | $\chi_M$ ( $\text{m}^3 \text{mol}^{-1}$ ) | $\mu_{\text{eff}}$ ( $\mu_B$ ) | $\mu_{\text{eff}}$ per iron atom ( $\mu_B$ ) |
|-------------------------------------------|-------------------------------------------|--------------------------------|----------------------------------------------|
| 2                                         | $1.12 \pm 0.11 \times 10^{-7}$            | $4.49 \pm 0.22$                | $2.24 \pm 0.11$                              |
| 4                                         | $1.75 \pm 0.18 \times 10^{-7}$            | $5.61 \pm 0.28$                | $1.40 \pm 0.07$                              |
| 6                                         | $2.61 \pm 0.26 \times 10^{-7}$            | $6.85 \pm 0.34$                | $1.14 \pm 0.06$                              |
| 8                                         | $3.43 \pm 0.35 \times 10^{-7}$            | $7.85 \pm 0.39$                | $0.98 \pm 0.05$                              |
| 10                                        | $4.38 \pm 0.44 \times 10^{-7}$            | $8.87 \pm 0.45$                | $0.89 \pm 0.04$                              |
| 12                                        | $5.32 \pm 0.54 \times 10^{-7}$            | $9.78 \pm 0.49$                | $0.81 \pm 0.04$                              |
| 14                                        | $6.40 \pm 0.65 \times 10^{-7}$            | $10.70 \pm 0.54$               | $0.76 \pm 0.04$                              |
| 16                                        | $7.37 \pm 0.74 \times 10^{-7}$            | $11.50 \pm 0.58$               | $0.72 \pm 0.03$                              |

**Table S2. Time-dependence of the  $\mu_{\text{eff}}$  values per iron atom of iron-loaded ferritin at different degrees of metallation, observed by Evans measurements at 298 K**

| Number of iron atoms per ferritin subunit | $t_{\text{stab}}$ (hours) | $\mu_{\text{eff}}$ per iron atom ( $\mu_B$ ) $t = 0$ | $\mu_{\text{eff}}$ per iron atom ( $\mu_B$ ) $t = t_{\text{stab}}$ |
|-------------------------------------------|---------------------------|------------------------------------------------------|--------------------------------------------------------------------|
| 2                                         | 1.5                       | $2.36 \pm 0.12$                                      | $2.24 \pm 0.11$                                                    |
| 4                                         | 24                        | $1.56 \pm 0.08$                                      | $1.40 \pm 0.07$                                                    |
| 6                                         | 24                        | $1.24 \pm 0.06$                                      | $1.14 \pm 0.06$                                                    |
| 8                                         | 24                        | $1.05 \pm 0.05$                                      | $0.98 \pm 0.05$                                                    |
| 10                                        | 24                        | $0.93 \pm 0.05$                                      | $0.89 \pm 0.04$                                                    |
| 12                                        | 24                        | $0.85 \pm 0.04$                                      | $0.81 \pm 0.04$                                                    |
| 14                                        | 24                        | $0.78 \pm 0.04$                                      | $0.76 \pm 0.04$                                                    |
| 16                                        | 24                        | $0.74 \pm 0.04$                                      | $0.72 \pm 0.03$                                                    |
